# Supplementary material
Source: PubMed Central journal article supplement (PMC2048861)
Supplement: bmj_39343.466863.55_1.pdf [file bmj_39343.466863.55_1.pdf]

## Web references [posted as supplied by author]

- W1. Donkervoort M, Dekker J, Stehmann-Saris FC, Deelman BG. Efficacy of strategy training in left hemisphere stroke patients with apraxia: a randomised clinical trial. *Neuropsychological Rehabilitation* 2001; 11(5):549-66.
- W2. Edmans JA, Webster J, Lincoln NB. A comparison of two approaches in the treatment of perceptual problems after stroke. *Clinical Rehabilitation* 2000; 14:230-43.
- W3. Jongbloed L, Stacey S, Brighton C. Stroke rehabilitation: sensorimotor integrative treatment versus functional treatment. *American Journal of Occupational Therapy* 1989; 43(6): 391-7.
- W4. Liu KPY, Chan CCH, Hui -Chan CWY. Pilot study on task generalization programme for people with stroke. *Cerebrovascular Diseases* 2001; 11(Suppl 4):64.
- W5. Morgan SB, Kelkar RS, Vyas, OA. Client centred occupational therapy for acute stroke patients. *The Indian Journal of Occupational Therapy*: 2002, Vol. XXXIV: No. 1.
- W6. Young GC, Collins D, Hren M. Effect of pairing scanning training with block design training in the remediation of perceptual problems in left hemiplegics. *Journal of Clinical Neuropsychology* 1983; 5:201-12.
- W7. Flinn NA. Clinical interpretation of effect of rehabilitation tasks on organization of movement after stroke. *American Journal of Occupational Therapy* 1999; 53(4): 345-7.
- W8. Goldenbrg G, Hagmann S. Therapy of activities of daily living in patients with apraxia. *Neuropsychological Rehabilitation* 1998;8(2): 123-41.
- W9. Gray A. Review of occupational therapy stroke services in adjoining health Trusts and Bradford Social Services. *National Research Register [electronic database] Issue 1, 2001.*
- W10. Unsworth CA, Cunningham DT. Examining the evidence base for occupational therapy with clients following stroke. *British Journal of Occupational therapy* 2002; 65(1): 21-9.
- W11. Wu C, Trombly Ca, Lin K, Tickle-Degnen L. Effects of object affordances on reaching performance in persons with and without cerebrovascular accident. *American Journal of Occupational Therapy* 1998; 52(6): 447-56.
- W12. Chamberlain MA, Thornly G, Stowe J, Wright V. Evaluation of aids and equipment for the bath: II. A possible solution to the problem. *Rheumatology and Rehabilitation* 1981; 20:38-43.
- W13. Soderback I, Guidetti S. The effect of personal care training at a medical department: a study in occupational therapy. *Clinical Rehabilitation* 1992;6:203-8.
- W14. Wressle E, Eeg-Olofsson A-M, Marcusson J, Henriksson C. Improved client participation in the rehabilitation process using a client centered goal formulation structure. *Journal of Rehabilitation Medicine* 2002;34:5-11.
- W15. Sun YH, Wang L, Wang ZS. Effects of home-based occupational therapy on motor function of limbs in patients with hemiplegia. *Hong Kong Medical Journal* 2001; 7(4): 25 (Abst P9).

- W16. Stalhandske M, Tuvemo-Johnson S, Terent A, Fugl-Meyer A. After stroke: a home based rehabilitation project 'lara leva efter stroke'. In: 9<sup>th</sup> Scandinavian Meeting on Cerebrovascular Diseases. Uppsala, Sweden, August 16-19, 1997.
- W17. Corr S, Bayer A. Occupational therapy for stroke patients after hospital discharge - a randomised controlled trial. *Clinical Rehabilitation* 1995; 9:291-296.
- W18. Gilbertson L, Langhorne P, Walker A, Allen A, Murray GD. Domiciliary occupational therapy for patients with stroke discharged from hospital: randomised controlled trial. *BMJ* 2000; 320:603-606.
- W19. Chiu WY, Man DWK. The effect of training older adults with stroke to use home-based assistive devices. *Occupational Therapy Journal of Research* 2004; 24(3): 113-20.
- W20. Drummond AER, Walker MF. A randomized controlled trial of leisure rehabilitation after stroke. *Clinical Rehabilitation* 1995; 9:283-290.
- W21. Walker MF, Drummond AER. Evaluation of dressing practice for stroke patients after discharge from hospital: a crossover design study. *Clinical Rehabilitation* 1996; 10:23-31.
- W22. Logan P, Ahern J, Gladman JRF, Lincoln NB. A randomized controlled trial of enhanced Social Service occupational therapy for stroke patients. *Clinical Rehabilitation* 1997; 11:107-113.
- W23. Walker MF, Gladman JRF, Lincoln NB, Siemonsma P, Whiteley T. Occupational therapy for stroke patients not admitted to hospital: a randomised controlled trial. *Lancet* 1999; 354:278-280.
- W24. Sackley C, Wade DT, Mant D, et al. Cluster randomized pilot controlled trial of an occupational therapy intervention for residents with stroke in UK care homes. *Stroke* 2006; 37: 2336-41.
- W25. Parker CJ, Gladman JRF, Drummond AER, Dewey ME, Lincoln NB, Barer D, Logan PA, Radford KA. A multicentre randomized controlled trial of leisure therapy and conventional occupational therapy after stroke. *Clinical Rehabilitation* 2001; 15:42-5
